# Supplementary material
Source: PubMed Central journal article supplement (PMC4105211)
Supplement: NIHMS589383-supplement-Appendix_B.pdf [file NIHMS589383-supplement-Appendix_B.pdf]

**First treatment, with (more/less) help**

How much did you like the treatment?

 1 2 3 4 5 

Not at all          Somewhat          Very much

How hard did you work?

1 2 3 4 5

Not at all          Somewhat          Very much

How much did it help you?

 1 2 3 4 5 

Not at all          Somewhat          Very much

**Second treatment, with (more/less) help**

How much did you like the treatment?

 1 2 3 4 5 

Not at all          Somewhat          Very much

How hard did you work?

1 2 3 4 5

Not at all          Somewhat          Very much

How much did it help you?

 1 2 3 4 5 

Not at all          Somewhat          Very much

**Compare the first and second treatment**

Treatment 1 = (more/less) help

Treatment 2 = (more/less) help

Which one did you like better?

Treatment 1                  Treatment 2

Which one did you work harder in?

Treatment 1                  Treatment 2

Which one do you think helped you more?

Treatment 1                  Treatment 2

*Note.* For clarity during the post-treatment Interview, we referred to the High Cue condition as “More Help” and the Low Cue condition as “Less Help.”
