# Supplementary material
Source: PubMed Central journal article supplement (PMC4105211)
Supplement: NIHMS589383-supplement-Appendix_D.pdf [file NIHMS589383-supplement-Appendix_D.pdf]

## Accuracy (% accuracy) – More severe participants

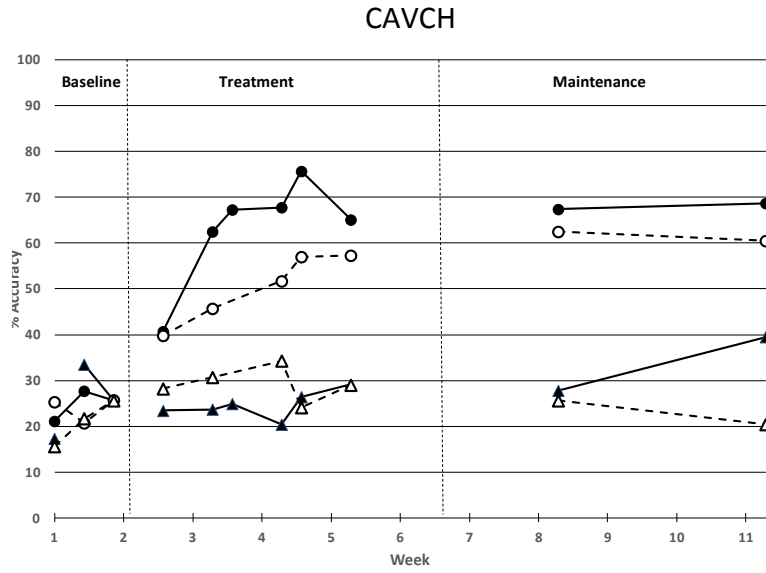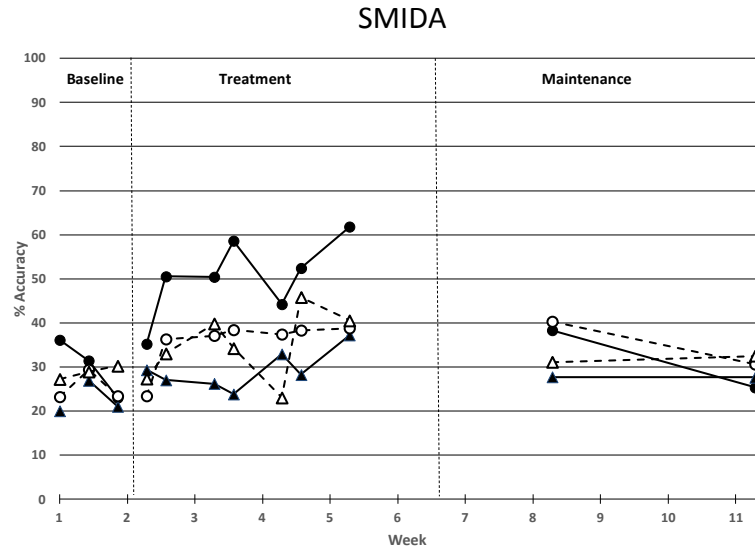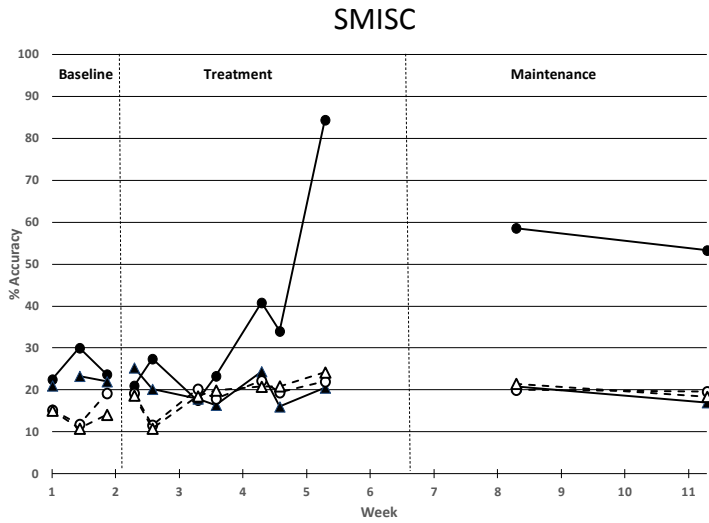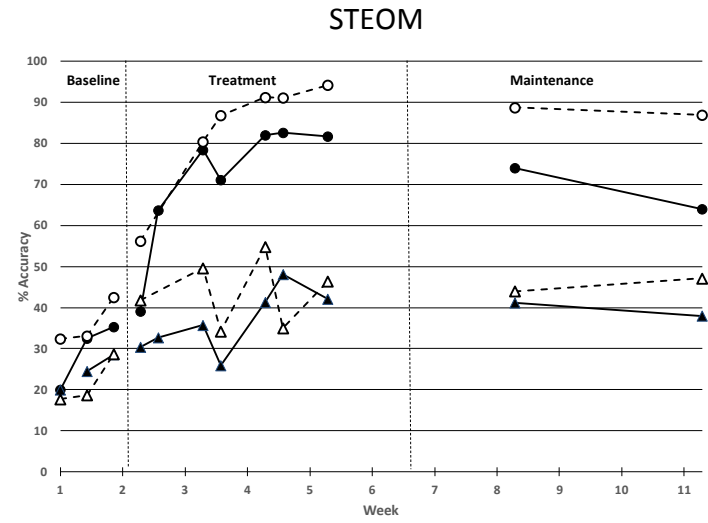

Trained - High Cue   
  Untrained - High Cue   
  Trained - Low Cue   
  Untrained - Low Cue
