# Supplementary material
Source: PubMed Central journal article supplement (PMC4105211)
Supplement: NIHMS589383-supplement-Appendix_F.pdf [file NIHMS589383-supplement-Appendix_F.pdf]

## Rate (words per minute) – More severe participants

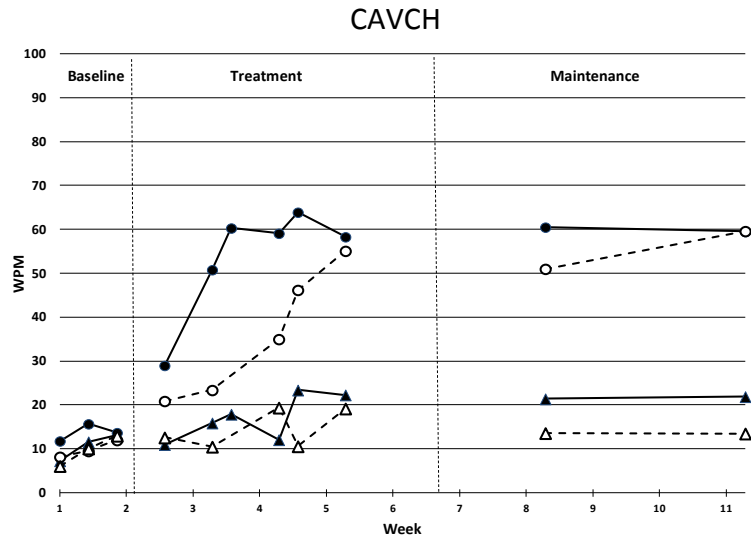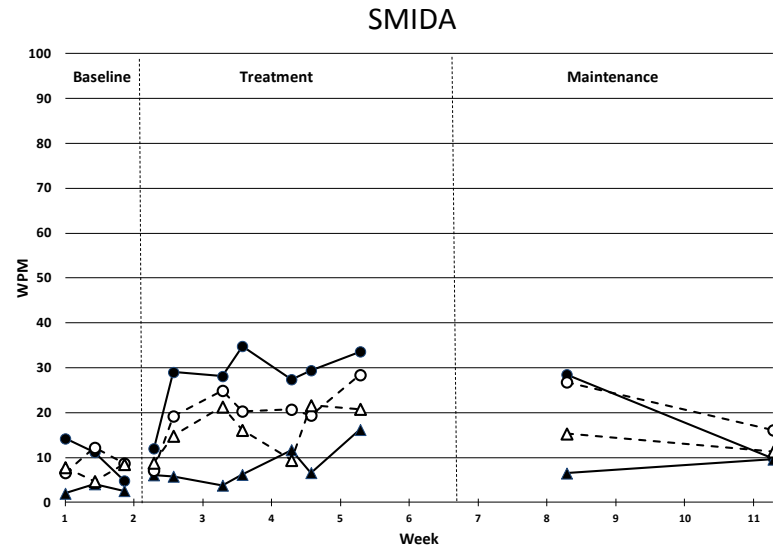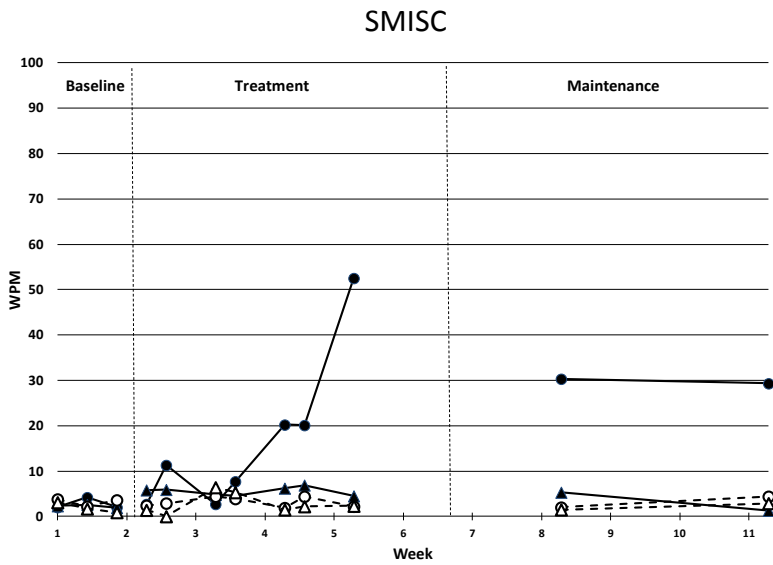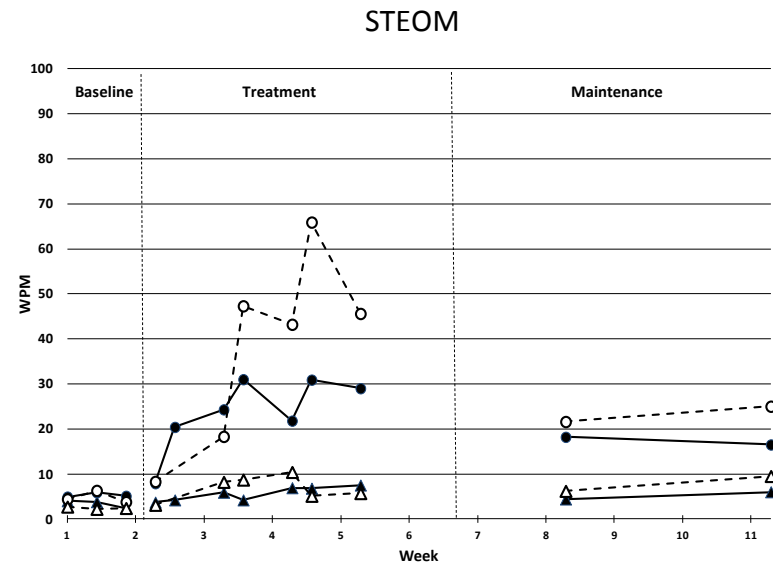

Trained - High Cue    
  Untrained - High Cue    
  Trained - Low Cue    
  Untrained - Low Cue
